# Supplementary material for: Changes in the Urine Metabolomic Profile in Patients Recovering from Severe COVID-19
Source: MDPI journal article supplement (doi:10.3390/metabo13030364), 2023-02-28
Supplement: s1 [file metabolites-2237593-supplementary.pdf › metabolites-2237593-supplementary.pdf]

# Supplement S1

Results from discriminatory analysis via cross-validated Random Forest for further combinations of groups, not included in the main manuscript with the most important metabolites responsible for discrimination

| tested system     | Features ranked by their contributions to classification accuracy                | discriminatory performance - OOB error | AUC value (for binary systems) |
|-------------------|----------------------------------------------------------------------------------|----------------------------------------|--------------------------------|
| <b>A-B-C-ctrl</b> | hippurate, citrate, hypoxanthine, pyruvate, carnitine, alanine, acetate, formate | 0.207                                  | -                              |
| <b>A-B-C</b>      | hippurate, citrate, hypoxanthine, carnitine, alanine, acetone, acetate, formate  | 0.176                                  | -                              |
| <b>A-B</b>        | hypoxanthine, alanine, formate, hippurate, carnitine, citrate                    | 0.196                                  | 0.913                          |
| <b>A-C</b>        | hippurate, citrate, alanine, acetone, carnitine, tyrosine, glycine               | 0.08                                   | 0.976                          |
| <b>B- C</b>       | carnitine, citrate, hypoxanthine, acetone, hippurate, formate, alanine           | 0.09                                   | 0.933                          |
